# Supplementary material
Source: PubMed Central journal article supplement (PMC2555956)
Supplement: E07-11-1188_1.pdf [file E07-11-1188_1.pdf]

**Table S1:** Strains used in this study. Unless specified otherwise, all genes are expressed from the *TDH3* promoter. Parent strains are in bold.

| Strain         | Genotype                                                                                                                                | Plasmid          |
|----------------|-----------------------------------------------------------------------------------------------------------------------------------------|------------------|
| <b>RHY471</b>  | <b><i>MAT<math>\alpha</math> ade2-101, ura3-52, met2, lys2-801, his3<math>\Delta</math>200</i></b>                                      | none             |
| RHY2739        | <i>ade2-101::ADE2::GAL1-10pr::1MYC-HMG2 K6R</i>                                                                                         | pRH1571          |
| RHY2740        | <i>ade2-101::ADE2::GAL1-10pr::1MYC-HMG1</i>                                                                                             | pRH1584          |
| <b>RHY2863</b> | <b><i>MAT<math>\alpha</math> ade2-101, ura3-52, met2, lys2-801, his3<math>\Delta</math>200, trp1::hisG, leu2<math>\Delta</math></i></b> | none             |
| RHY6433        | <i>ura3-52::URA3::1MYC-HMG2 K6R</i>                                                                                                     | pRH2218          |
| RHY6531        | <i>ade2-101::ADE2::1MYC-HMG1</i>                                                                                                        | pRH1593          |
| RHY6908        | <i>ade2-101::ADE2::3MYC-OLE1-2hN-GFP H161A, H166A</i>                                                                                   | pRH2416          |
| RHY6906        | <i>ade2-101::ADE2::3MYC-OLE1-GFP H161A, H166A</i>                                                                                       | pRH2411          |
| RHY6907        | <i>ade2-101::ADE2::3MYC-OLE1-CD1 H161A, H166A</i>                                                                                       | pRH2414          |
| RHY6904        | <i>ade2-101::ADE2::3MYC-OLE1-CD2 H161A, H166A</i>                                                                                       | pRH2406          |
| RHY6123        | <i>ura3-52::URA3::3MYC-OLE1 H161A, H166A</i>                                                                                            | pRH1828          |
| RHY6334        | <i>ade2-101::ADE2::1MYC-HMG2 K6R, D711N, E920Q (stable, inactive HMG2)</i>                                                              | pRH2108          |
| RHY6333        | <i>ura3-52::URA3::1MYC-HMG2<math>\Delta</math>618-1045 K6R (HMG2 TM)</i>                                                                | pRH2251          |
| RHY6934        | <i>ade2-101::ADE2::1MYC-HMG2<math>\Delta</math>672-1045 K6R (HMG2-TM-hN)</i>                                                            | pRH2429          |
| RHY5590        | <i>ura3-52::URA3::HMG2-TM-hN-GFP K6R</i>                                                                                                | pRH2171          |
| RHY6933        | <i>ade2-101::ADE2::HMG2-TM-GFP K6R</i>                                                                                                  | pRH2427          |
| RHY6131        | <i>ura3-52::URA3::GFP</i>                                                                                                               | pRH1743          |
| RHY6128        | <i>ura3-52::URA3::HMG2<math>\Delta</math>1-527 (CD of HMG2)</i>                                                                         | pRH2229          |
| RHY6129        | <i>ura3-52::URA3::HMG2<math>\Delta</math>1-527, E711Q, D920N (inactive CD of HMG2)</i>                                                  | pRH2134          |
| RHY6085        | <i>ura3-52::URA3</i>                                                                                                                    | pRH313           |
| RHY6442        | <i>ade2-101::ADE2::1MYC-HMG2 K6R, ura3-52::URA3::1MYC-HMG2 K6R</i>                                                                      | pRH2218, pRH1576 |
| RHY6635        | <i>ade2-101::ADE2::1MYC-HMG1, ura3-52::URA3::1MYC-HMG1</i>                                                                              | pRH945, pRH1593  |
| RHY6921        | <i>ade2-101::ADE2::3MYC-OLE1-2hN-GFP H161A, H166A, ura3-52::URA3::3MYC-OLE1-2hN-GFP H161A, H166A</i>                                    | pRH2416, pRH2413 |
| RHY6922        | <i>ade2-101::ADE2::3MYC-OLE1-GFP H161A, H166A, ura3-52::URA3::3MYC-OLE1-GFP H161A, H166A</i>                                            | pRH2411, pRH2415 |
| RHY6927        | <i>ade2-101::ADE2::3MYC-OLE1-CD1 H161A, H166A, ura3-52::URA3::3MYC-OLE1-CD1 H161A, H166A</i>                                            | pRH2414, pRH2418 |
| RHY6928        | <i>ade2-101::ADE2::3MYC-OLE1-CD2 H161A, H166A, ura3-52::URA3::3MYC-OLE1-CD2 H161A, H166A</i>                                            | pRH2406, pRH2407 |
| RHY6543        | <i>ade2-101::ADE2::3MYC-OLE1 H161A, H166A, ura3-52::URA3::3MYC-OLE1 H161A, H166A</i>                                                    | pRH1828, pRH2107 |

| Strain  | Genotype                                                                                                     | Plasmid          |
|---------|--------------------------------------------------------------------------------------------------------------|------------------|
| RHY6409 | <i>ade2-101::ADE2::1MYC-HMG2 K6R, D711N, E920Q, ura3-52::URA3::HMG2 K6R, D711N, E920Q</i>                    | pRH2108, pRH2232 |
| RHY6372 | <i>ade2-101::ADE2::1MYC-HMG2Δ618-1045 K6R (HMG2 TM), ura3-52::URA3::1MYC-HMG2Δ618-1045 K6R (HMG2 TM)</i>     | pRH2251, pRH2264 |
| RHY6943 | <i>ade2-101::ADE2::1MYC-HMG2Δ672-1045 K6R (HMG2 TM*), ura3-52::URA3::1MYC-HMG2Δ672-1045 K6R (HMG2-TM-hN)</i> | pRH2429, pRH2430 |
| RHY6194 | <i>ade2-101::ADE2::HMG2-TM-hN-GFP K6R, ura3-52::URA3::HMG2-TM-hN-GFP K6R</i>                                 | pRH2171, pRH1738 |
| RHY6942 | <i>ade2-101::ADE2::HMG2-TM-GFP K6R, ura3-52::URA3::HMG2-TM-GFP K6R</i>                                       | pRH2427, pRH2428 |
| RHY5609 | <i>ura3-52::URA3::HMG2-TM-hN-GFP K6R, nem1Δ::KanMX</i>                                                       | pRH2171          |
| RHY5594 | <i>ura3-52::URA3::HMG2-TM-hN-GFP K6R, hof1Δ::KanMX</i>                                                       | pRH2171          |
| RHY5599 | <i>ura3-52::URA3::HMG2-TM-hN-GFP K6R, her2Δ::KanMX</i>                                                       | pRH2171          |
| RHY6034 | <i>ura3-52::URA3::HMG2-TM-hN-GFP K6R, cod1/spf11Δ::KanMX</i>                                                 | pRH2171          |
| RHY6195 | <i>ade2-101::ADE2::HMG2-TM-hN-GFP K6R, ura3-52::URA3::HMG2-TM-hN-GFP K6R, cod1/spf11Δ::KanMX</i>             | pRH1738, pRH2171 |
| RHY7291 | <i>ura3-52::URA3::HMG2-TM-hN-GFP K6R, trp1::hisG::TRP1::HRD1-HA</i>                                          | pRH2171, pRH1600 |
| RHY7292 | <i>ura3-52::URA3::HMG1Δ67-GFP, trp1::hisG::TRP1::HRD1-HA</i>                                                 | pRH1110, pRH1600 |
| RHY7292 | <i>ade2-101::ADE2::HMG1Δ67-GFP, TEFpr::ERG28-HA on URA3 cen plasmid</i>                                      | pRH2171, pIU2589 |
| RHY6833 | <i>ura3-52::URA3::HMG2 K6R, psd1Δ::KanMX</i>                                                                 | pRH2218          |
| RHY7095 | <i>ura3-52::URA3::HMG2 K6R, opi3Δ::KanMX</i>                                                                 | pRH2218          |
| RHY7096 | <i>ura3-52::URA3::HMG2 K6R, cho2Δ::KanMX</i>                                                                 | pRH2218          |
| RHY7297 | <i>ura3-52::URA3::HMG2 K6R, cki1Δ::KanMX</i>                                                                 | pRH2218          |
| RHY7301 | <i>ura3-52::URA3::HMG2 K6R, cpt1Δ::KanMX</i>                                                                 | pRH2218          |
| RHY7305 | <i>ura3-52::URA3::HMG2 K6R, ept1Δ::KanMX</i>                                                                 | pRH2218          |
| RHY6240 | <i>ura3-52::URA3::HMG2-TM-hN-GFP K6R, psd1Δ::KanMX</i>                                                       | pRH2171          |
| RHY6823 | <i>ura3-52::URA3::HMG2-TM-hN-GFP K6R, opi3Δ::KanMX</i>                                                       | pRH2171          |
| RHY6822 | <i>ura3-52::URA3::HMG2-TM-hN-GFP K6R, cho2Δ::KanMX</i>                                                       | pRH2171          |
| RHY7296 | <i>ura3-52::URA3::HMG2-TM-hN-GFP K6R, cki1Δ::KanMX</i>                                                       | pRH2171          |

|               |                                                                                             |                       |
|---------------|---------------------------------------------------------------------------------------------|-----------------------|
| RHY7300       | <i>ura3-52::URA3::HMG2-TM-hN-GFP K6R, cpt1Δ::KanMX</i>                                      | pRH2171               |
| RHY7304       | <i>ura3-52::URA3::HMG2-TM-hN-GFP K6R, ept1Δ::KanMX</i>                                      | pRH2171               |
| RHY6623       | <i>ura3-52::URA3, ade2-101:ADE2, psd1Δ::KanMX</i>                                           | pRS402,<br>pRS403     |
| RHY6948       | <i>ura3-52::URA3::HMG2 K6R, ade2-101::ADE2::HMG2 K6R, psd1Δ::KanMX</i>                      | pRH1576,<br>pRH2218   |
| RHY7097       | <i>ura3-52::URA3::HMG1, ade2-101::ADE2::HMG1</i>                                            | pRH105-25,<br>pRH2438 |
| RHY6545       | <i>ura3-52::URA3::1MYC-HMG2Δ1-527 (CD of HMG2), ade2-101::ADE2::HMG2Δ1-527 (CD of HMG2)</i> | pRH2229,<br>pRH1583   |
|               |                                                                                             |                       |
| <b>RH1982</b> | <b><i>MATa ade2-101, ura3-52, met2, lys2-801, his3Δ200, TRP1, leu2Δ, 3MYC-COD1/SPF1</i></b> | none                  |
| RHY7290       | <i>ura3-52::URA3::HMG2-TM-hN-GFP K6R</i>                                                    | pRH2171               |
| RHY7289       | <i>ura3-52::URA3::HMG1Δ67-GFP</i>                                                           | pRH1110               |
|               |                                                                                             |                       |
| <b>Y3656</b>  | <b><i>MATα lys2Δ0 ura3Δ leu2Δ0 his3Δ0 met15Δ0 can1Δ::MFA1pr-HIS3-Mfalp1pr-LEU2</i></b>      | none                  |
| RHY3013       | <i>ADE2::NatMX::GAL1-10pr::Hmg2p-TM-hN-GFP K6R</i>                                          | pRH2978               |

**Table S2:** Genes identified in the *HER* screen

---

|               |               |                  |                       |
|---------------|---------------|------------------|-----------------------|
| <b>ABP1</b>   | <b>ERG2</b>   | RPL19B           | <b>VPS25</b>          |
| ADK1          | <b>ERG28</b>  | RPL21A           | <b>VPS3</b>           |
| <b>ALG8</b>   | <b>ERV25</b>  | RPL43A           | <b>VPS36</b>          |
| <b>APL4</b>   | <b>FYV1</b>   | RPP2B            | <b>VRP1</b>           |
| ARP8          | GLY1          | RPS1B            | <b>VTA1</b>           |
| <b>ATX2</b>   | <b>GUP2</b>   | RPS4A            | WHI4                  |
| <b>AVT1</b>   | <b>HOF1</b>   | RPS9B            | YMC2                  |
| <b>BDF1</b>   | HTL1          | <b>RSM19</b>     | ZUO1                  |
| <b>BEM4</b>   | IRE1          | <b>RVS167</b>    | <b>YBL083C</b>        |
| <b>BNI1**</b> | LEA1          | SAM2             | <b>YLR374C</b>        |
| <b>BNR1</b>   | LOC1          | <b>SGM1</b>      | <b>YNL170W*</b>       |
| BRE1          | MGS1          | <b>SFK1</b>      | <b>YOR227W (HER1)</b> |
| BUB1          | <b>MMS1</b>   | SNF6             | <b>YOR200W</b>        |
| BUD27         | NCE4          | SOH1             | <b>YMR293C (HER2)</b> |
| BUD32         | <b>NEM1</b>   | <b>COD1/SPF1</b> | <b>YMR259C</b>        |
| CAN1          | <b>NPL3</b>   | <b>SPO7**</b>    | <b>YPL182C</b>        |
| <b>CHO2**</b> | NPL6          | SPT2             | <b>YPR153W</b>        |
| CCE1          | <b>OPI1</b>   | SRO7             | <b>YPR146C</b>        |
| CLB2          | <b>OPI3**</b> | SSE1             | YPR127W               |
| CPA1          | PEP12         | <b>TFP3</b>      | YDR532C               |
| <b>CSF1</b>   | <b>PET56</b>  | TPS2             | <b>YNR025C</b>        |
| <b>CSG2</b>   | <b>PPS1</b>   | <b>TUF1</b>      | <b>YLR358C</b>        |
| <b>DIA2</b>   | RAD5          | URA10            | YJR014W               |
| DOA4          | <b>REF2</b>   | <b>VMA2</b>      | YKR096W               |
| ECM40         | <b>ROM2</b>   | <b>VMA4</b>      | <b>YPR045C</b>        |
| <b>EGT2</b>   | RPL13B        | <b>VMA7</b>      | <b>YDL206W</b>        |

---

**bold** – manually deleted and scored (secondary screen)

**red** – identified as *HER* genes through secondary screen

\* - overlaps with *PSD1* ORF

\*\* - not identified in primary screen, tested based on identified *HER* genes

---
